# Supplementary material for: Flexible quasi-solid-state zinc ion batteries enabled by highly conductive carrageenan bio-polymer electrolyte
Source: Royal Society of Chemistry journal article supplement (doi:10.1039/c9ra01120j), 2019-01-01
Supplement: c9ra01120j2.pdf [file c9ra01120j2.pdf]

Supplementary Information

**Flexible quasi-solid-state zinc ion batteries enabled by highly  
conductive carrageenan bio-polymer electrolyte**

Yuan Huang, Jiuwei Liu, Jiyan Zhang, Shunyu Jin, Yixiang Jiang, Guoqing Du,

Shengdong Zhang, Zigang Li, Chunyi Zhi, Guoqing Du, Hang Zhou

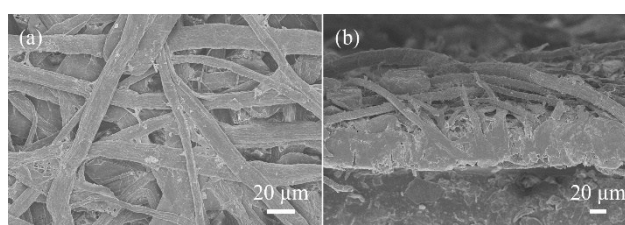

**Fig. S1** (a) SEM image of rice paper. (b) The cross-sectional SEM image of rice paper.

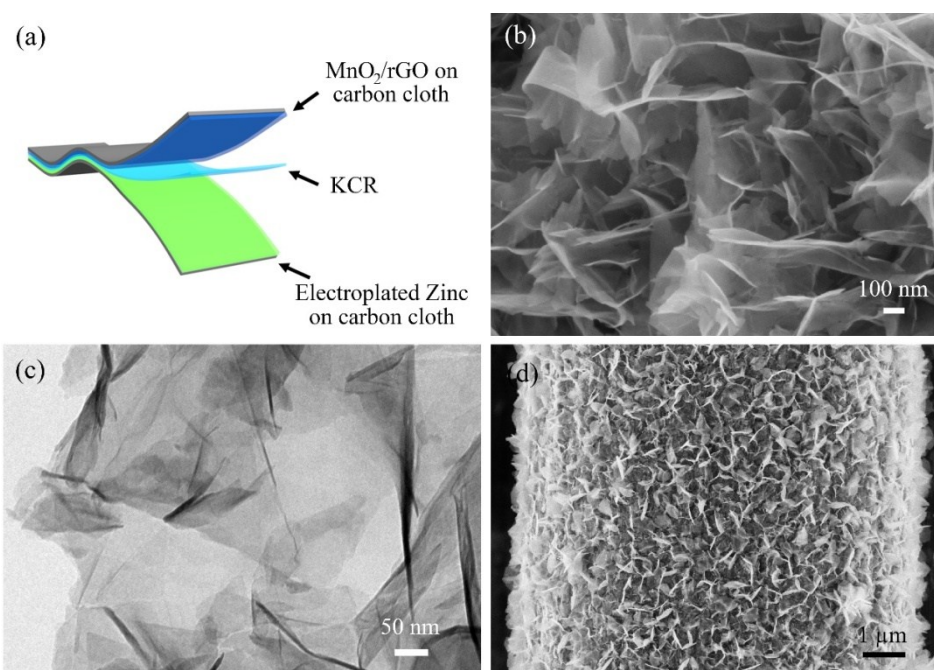

**Fig. S2** (a) Schematic illustration for the structure of solid-state Zn-MnO<sub>2</sub> battery. (b) SEM image of the MnO<sub>2</sub> nanosheets. (c) TEM image of the MnO<sub>2</sub> nanosheets. (d)

SEM images of electroplated Zn on carbon cloth.

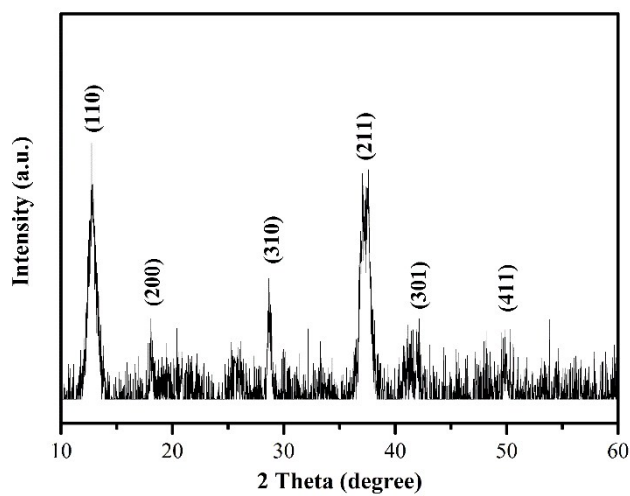

Fig. S3 XRD spectrum of MnO<sub>2</sub>.

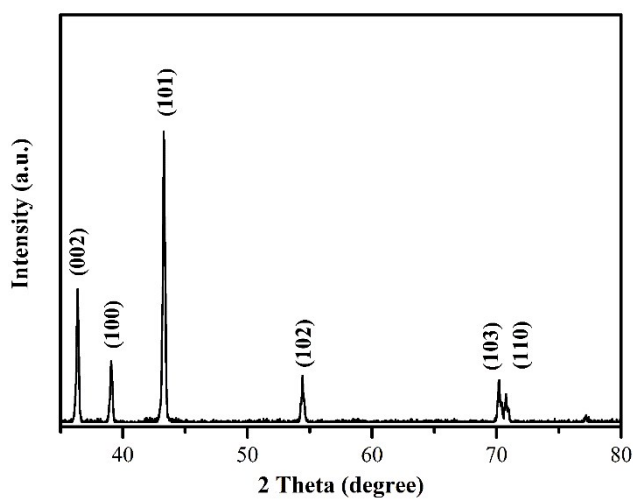

Fig. S4 XRD spectrum of electroplated Zn on carbon cloth.

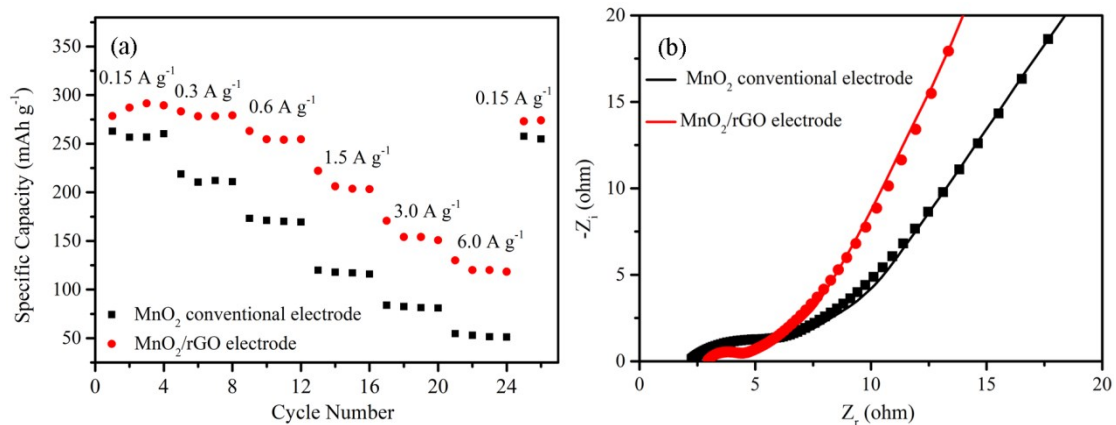

**Fig. S5** (a) Specific capacities of solid-state ZIBs with MnO<sub>2</sub> conventional electrode and MnO<sub>2</sub>/rGO electrode at various current density. (d) Nyquist plots of the samples after charging to ~1.9 V vs. Zn<sup>2+</sup>/Zn.

As shown in Fig. S5a, solid-state ZIBs with MnO<sub>2</sub>/rGO electrode can deliver discharging capacity of ~291.5 mAh g<sup>-1</sup> at 0.15 A g<sup>-1</sup>. When the rate is increased to 6.0 A g<sup>-1</sup>, the cell achieves a discharge capability of 120.0 mA h g<sup>-1</sup>. As a comparison, solid-state ZIBs with conventional MnO<sub>2</sub> electrode exhibit much lower discharge capacity, that is, ~262.9 mA h g<sup>-1</sup> at 0.15 A g<sup>-1</sup>, and further drops to ~54.7 mA h g<sup>-1</sup> at 6.0 A g<sup>-1</sup>. The electrochemical impedance spectroscopy (EIS) measurements were also carried out on the cell with MnO<sub>2</sub>/rGO electrode and conventional MnO<sub>2</sub> electrode. The corresponding Nyquist plots (dot) and fitting results (line) are shown in Fig. S5b. The charge-transfer resistance of MnO<sub>2</sub>/rGO sample is 1.3 Ω, which is lower than that of conventional MnO<sub>2</sub> sample (3.7 Ω). On the basis of the results above, the incorporation of rGO in MnO<sub>2</sub>-based electrodes improves rate performance of the cells. This enhancement ascribed to the formation of conductive pathways for electron transport during the charging/discharging process, as evidenced in decreased charge transfer resistance.

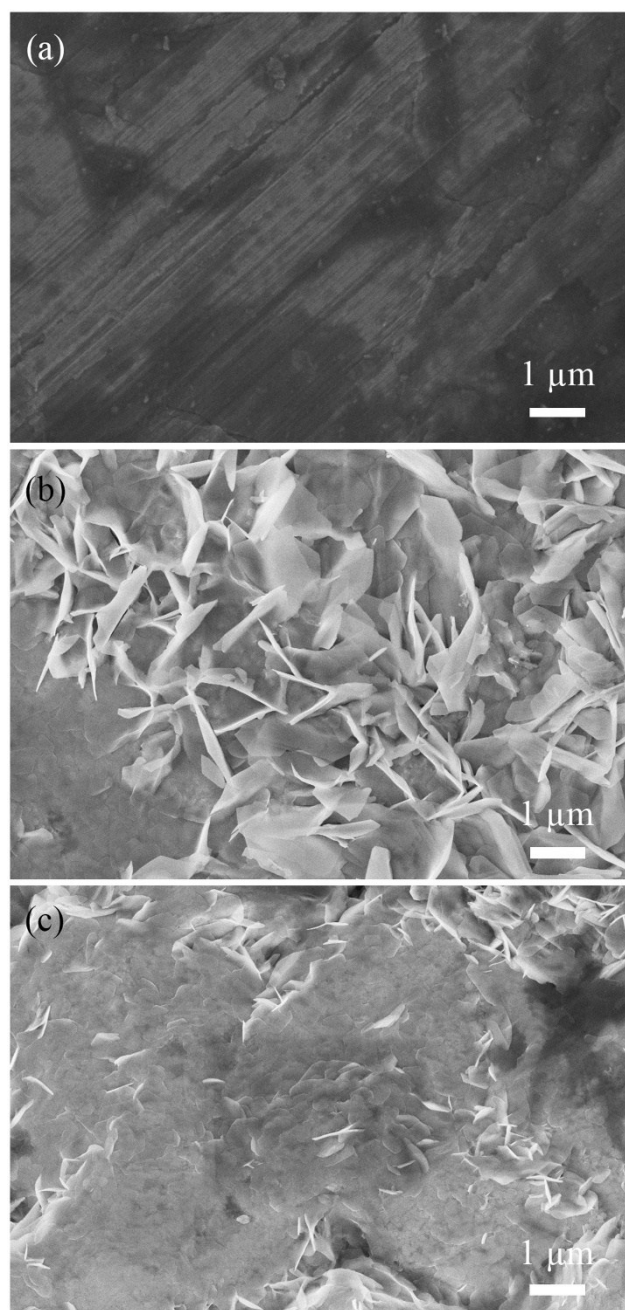

**Fig. S6** SEM images of (a) fresh zinc foil, zinc foil after 100 cycles (at  $6 \text{ A g}^{-1}$ ) in (b) aqueous electrolyte and (c) KCR electrolyte.

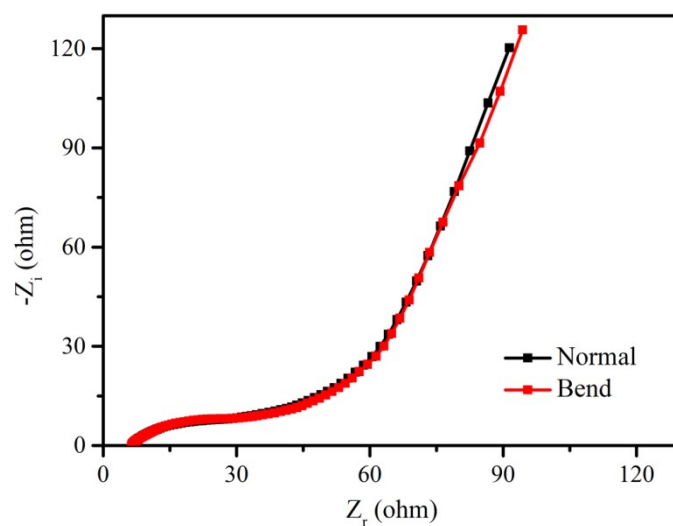

**Fig. S7** AC impedance spectra of the solid-state ZIBs with KCR electrolyte under normal and bending conditions.

**Table S1.** Comparison of KCR electrolyte with some zinc-salt-polymer-electrolytes in terms of ionic conductivity in the literatures.

| Polymer matrices                                     | Ionic conductivity<br>(mS cm <sup>-1</sup> ) | Zinc salts                                        | Reference                               |
|------------------------------------------------------|----------------------------------------------|---------------------------------------------------|-----------------------------------------|
| Kappa-Carrageenan                                    | 33.2                                         | ZnSO <sub>4</sub>                                 | This work                               |
| xanthan gum                                          | 14.6                                         | ZnSO <sub>4</sub>                                 | J. Mater. Chem. A,<br>2018, 6, 12237    |
| A gelatin and PAM based<br>hierarchical polymer      | 17.6                                         | ZnSO <sub>4</sub>                                 | Energy Environ. Sci.,<br>2018, 11, 941  |
| Gelatin                                              | 5.68                                         | ZnSO <sub>4</sub>                                 |                                         |
| poly(vinylidene fluoride-co-<br>hexafluoropropylene) | 1.73                                         | Zn(CF <sub>3</sub> SO <sub>3</sub> ) <sub>2</sub> | J. Membrane Sci.,<br>2014, 469, 499     |
| PEO                                                  | 0.5~0.8                                      | ZnCl <sub>2</sub>                                 | Solid State Ion.,<br>2005, 176, 1797    |
| PEO                                                  | 2~4                                          | ZnCl <sub>2</sub>                                 | J. Electrochem.Soc.,<br>2007, 154, A554 |

|                                                      |                    |                                                   |                                           |
|------------------------------------------------------|--------------------|---------------------------------------------------|-------------------------------------------|
| Poly- $\epsilon$ -caprolactone Express               | 0.88               | Zn(CF <sub>3</sub> SO <sub>3</sub> ) <sub>2</sub> | Polym. Lett.,<br>2013,7,495               |
| Poly(4-vinylpyridine)                                | 2×10 <sup>-5</sup> | Zn(ClO <sub>4</sub> ) <sub>2</sub>                | Macromolecules,<br>2004, 37, 192          |
| PAN                                                  | 0.22               | ZnSO <sub>4</sub>                                 | J. New Mat. Electr.<br>Sys., 2001, 4, 135 |
| PAN                                                  | 0.78               | ZnCl <sub>2</sub>                                 | J. New Mat. Electr.<br>Sys., 2001, 4, 135 |
| poly(vinylidene fluoride<br>-co-hexafluoropropylene) | 3.82               | ZnTf <sub>2</sub>                                 | Electrochim. Acta,<br>2015,176, 1447      |
| poly(vinylidene fluoride)                            | 3.94               | zinc triflate                                     | Solid State Ion.,<br>2003,160,289         |

Table S2. Comparison of the rate performance of ZIBs (Zn-MnO<sub>2</sub>) with KCR electrolyte and other solid-state electrolyte in the literature.

| Solid-state Electrolyte                                                                                 | Rate                                                                                                       | Ref                                                  |
|---------------------------------------------------------------------------------------------------------|------------------------------------------------------------------------------------------------------------|------------------------------------------------------|
| Kappa-Carrageenan/rice paper electrolyte +ZnSO <sub>4</sub> /MnSO <sub>4</sub>                          | 120 mAh g <sup>-1</sup> at 6.0 A<br>g <sup>-1</sup><br>206 mAh g <sup>-1</sup> at 1.5 A<br>g <sup>-1</sup> | This work                                            |
| EG based waterborne anionic polyurethane acrylates/polyacrylamide +ZnSO <sub>4</sub> /MnSO <sub>4</sub> | 162 mAh g <sup>-1</sup> at 1.6 A<br>g <sup>-1</sup>                                                        | <i>Energy Environ. Sci.</i><br><b>2019</b> , 12, 706 |
| polyacrylamide+gelatin+ ZnSO <sub>4</sub> /MnSO <sub>4</sub>                                            | 150 mAh g <sup>-1</sup> at 1.848<br>A g <sup>-1</sup>                                                      | <i>Energy Environ. Sci.</i><br><b>2018</b> , 11, 941 |
| xanthan gum+ ZnSO <sub>4</sub> /MnSO <sub>4</sub>                                                       | 120-150 mAh g <sup>-1</sup> at<br>3.08 A g <sup>-1</sup>                                                   | <i>J. Mater. Chem. A</i> <b>2018</b> ,<br>6, 12237   |
| poly(vinyl alcohol)/LiCl+ZnCl <sub>2</sub> /MnSO <sub>4</sub>                                           | 201 mAh g <sup>-1</sup> at 6.0 A<br>g <sup>-1</sup>                                                        | <i>J. Mater. Chem. A</i><br><b>2017</b> , 5, 14838   |

|                                                                                   |                                                                            |                                                                    |
|-----------------------------------------------------------------------------------|----------------------------------------------------------------------------|--------------------------------------------------------------------|
| poly(vinyl alcohol)/LiCl+ZnCl <sub>2</sub> /MnSO <sub>4</sub>                     | 76 mAh g <sup>-1</sup> at 5.58 A g <sup>-1</sup>                           | <i>Adv. Mater.</i> <b>2017</b> , <i>29</i> , 1700274               |
| 1-Buthyl-3-methylimidazolium trifluoromethanesulfonate+ZnTf <sub>2</sub>          | 78 mAh g <sup>-1</sup> at 2 A g <sup>-1</sup>                              | <i>Electrochem. Commun.</i> <b>2015</b> , <i>60</i> ,190           |
| poly(vinylidene fluoride)+zinc triflate                                           | 37 mAh g <sup>-1</sup> at 200 μA cm <sup>-2</sup> (66 mA g <sup>-1</sup> ) | <i>Solid State Ion.</i> <b>2003</b> , <i>160</i> , 289             |
| poly(vinyl alcohol)+ZnTFS                                                         | 45 mAh g <sup>-1</sup> at 2 A g <sup>-1</sup>                              | <i>ACS Appl. Mater. Interfaces</i> <b>2018</b> , <i>10</i> , 24573 |
| 1-Ethyl-3-methylimidazolium bis(trifluoromethylsulfonyl) imide+ ZnTf <sub>2</sub> | 125 mAh g <sup>-1</sup> at 1 mA cm <sup>-2</sup>                           | <i>Electrochim. Acta</i> <b>2015</b> , <i>176</i> , 1447           |

Table S3. Comparison of the rate performance of ZIBs (Zn-MnO<sub>2</sub>) with KCR electrolyte and other solid-state electrolyte in the literature.

| Electrochemical energy storage devices                                         | Energy density and Power density                                                                            | Ref                                                                |
|--------------------------------------------------------------------------------|-------------------------------------------------------------------------------------------------------------|--------------------------------------------------------------------|
| Kappa-Carrageenan/rice paper electrolyte +ZnSO <sub>4</sub> /MnSO <sub>4</sub> | 400 W h kg <sup>-1</sup> / 0.2 kW kg <sup>-1</sup><br>171 W h kg <sup>-1</sup> / 7.9 kW kg <sup>-1</sup>    | This work                                                          |
| solid state ZIB (ZnSO <sub>4</sub> /MnSO <sub>4</sub> -xanthan gum)            | 364 Wh kg <sup>-1</sup> at 1C<br>2.5 KW kg <sup>-1</sup> at 10C                                             | <i>J. Mater. Chem. A</i> <b>2018</b> , <i>6</i> , 12237            |
| solid state ZIB (LiCl-ZnCl <sub>2</sub> /MnSO <sub>4</sub> -PVA)               | 504.9 W h kg <sup>-1</sup> / 0.67 kW kg <sup>-1</sup><br>117 W h kg <sup>-1</sup> / 8.6 kW kg <sup>-1</sup> | <i>Adv. Mater.</i> <b>2017</b> , <i>29</i> , 1700274               |
| solid state ZIB (LiCl-ZnCl <sub>2</sub> -PVA)                                  | 360 W h kg <sup>-1</sup> / 0.1 kW kg <sup>-1</sup>                                                          | <i>ACS Appl. Mater. Interfaces</i> <b>2018</b> , <i>10</i> , 24573 |
